# Supplementary material for: Intraurban socioeconomic inequalities in life expectancy: a population-based cross-sectional analysis in the city of Córdoba, Argentina (2015–2018)
Source: PubMed Central journal article supplement (PMC9442478; doi:10.1136/bmjopen-2022-061277), 2022-09-02

## Supplementary material

### Modeling the mortality rate

We employ the Bayesian adaptation of the tool for projecting age patterns using linear splines method (TOPALS) which incorporates spatial smoothing in small areas.<sup>19</sup>

For age  $a$   $\{a = 0, 1, 2, \dots, 85\}$  and small area  $i$   $\{i = 1, 2, \dots, 99\}$  with corresponding population  $n_{ia}$ , we assume that the number of deaths comes from a Poisson distribution with underlying rate  $\lambda_{ia}$ .

$$y_{ia} | \lambda_{ia} \sim \text{Pois}(n_{ia} \lambda_{ia})$$

We further assume that the vector of log mortality rates in small area  $i$  is,

$$\log(\boldsymbol{\lambda}_i) = \log(\boldsymbol{\lambda}^*) + \mathbf{B} \boldsymbol{\beta}_k,$$

Where  $\boldsymbol{\lambda}_i$  is the vector with elements  $\lambda_{ia}$  representing age-specific mortality rates in small areas,  $\boldsymbol{\lambda}^*$  is the vector of standard mortality schedule (i.e., the smoothed city-level rates),  $\mathbf{B}$  is a matrix of constants of size  $86 \times 7$  in which each column is a linear B-spline basis function, and  $\boldsymbol{\beta}_k$  is a vector of parameters with elements  $\beta_{ik}$  representing offsets to the standard schedule.

We define knots at ages  $t_0, \dots, t_6 = (0, 1, 10, 20, 40, 70, 85)$ . For ages  $a$  in  $\{0, 1, 2, \dots, 85\}$  and columns  $k$  in  $\{1, \dots, 7\}$  the basis functions in  $\mathbf{B}$  are:

$$\begin{aligned} & \frac{a - t_{k-1}}{t_k - t_{k-1}} \text{ if } t_{k-1} \leq a \leq t_k; \\ & \frac{t_{k+1} - a}{t_{k+1} - t_k} \text{ if } t_k \leq a \leq t_{k+1}; \\ & 0 \text{ otherwise.} \end{aligned}$$

We further decompose the  $\beta_{ik}$  into the intercepts at each knot,  $\beta_{0k}$ ; the spatial random effects,  $z_{ik}$ ; and unstructured random effects,  $\phi_{ik}$  that vary by knot age and area.

$$\beta_{ik} = \beta_{0k} + z_{ik} + \phi_{ik}.$$

We assign the unstructured, non-spatial random effect ( $\phi_{ik}$ ) an exchangeable zero-mean normal prior with the knot-specific variance  $\sigma_{ns;k}^2$ . The variance parameter in turn receives the uninformative inverse gamma hyper-prior with the shape and rate parameter of 1 and 0.01, respectively.

That is,

$$\begin{aligned} \phi_{ik} & \sim \text{Normal}(0, \sigma_{ns;k}^2) \\ \sigma_{ns;k}^2 & \sim \text{Inverse Gamma}(1, 0.01) \end{aligned}$$

For the intercept  $\beta_{0k}$ , we assign a vague normal prior with mean 0 and variance of 1,000. That is,

$$\beta_{0k} \sim \text{Normal}(0, 1000)$$

For the spatial random effect  $z_{ik}$ , we assign the intrinsic conditional autoregressive (ICAR) prior distribution<sup>45</sup> for each knots,  $k$ . We define areas  $i$  and  $j$  as neighbors if they share one or more common vertex between boundaries, commonly referred to as Queen's contiguity.

For any given knot and for each area  $i$ , the conditional expected value of  $z_{ik}$  is the mean of its neighboring areas, and the variance of  $z_{ik}$  is inversely proportional to the number of neighbors for that area,  $m_i$ .

If we drop the subscript for knot here, we can denote the CAR distribution as:

$$z_i | z_{-i}, \mathbf{W}, \sigma_z^2 \sim \text{Normal}\left(\bar{z}_i, \frac{\sigma_z^2}{m_i}\right),$$

where

$$\bar{z}_i = \sum_{j, j \neq i} \frac{w_{i,j} z_j}{m_i}$$

and  $W = [w_{i,j}]$  is  $99 \times 99$  adjacency matrix with elements  $w_{i,j} = 1$  if areas  $i$  and  $j$  are neighbors and 0 otherwise. We complete the prior specification by assigning a weakly informative inverse gamma prior (1, 0.14) for the variance of CAR random effects.

Figure S1. Log mortality rates due to all causes for women and men. Córdoba, 2015-2018.

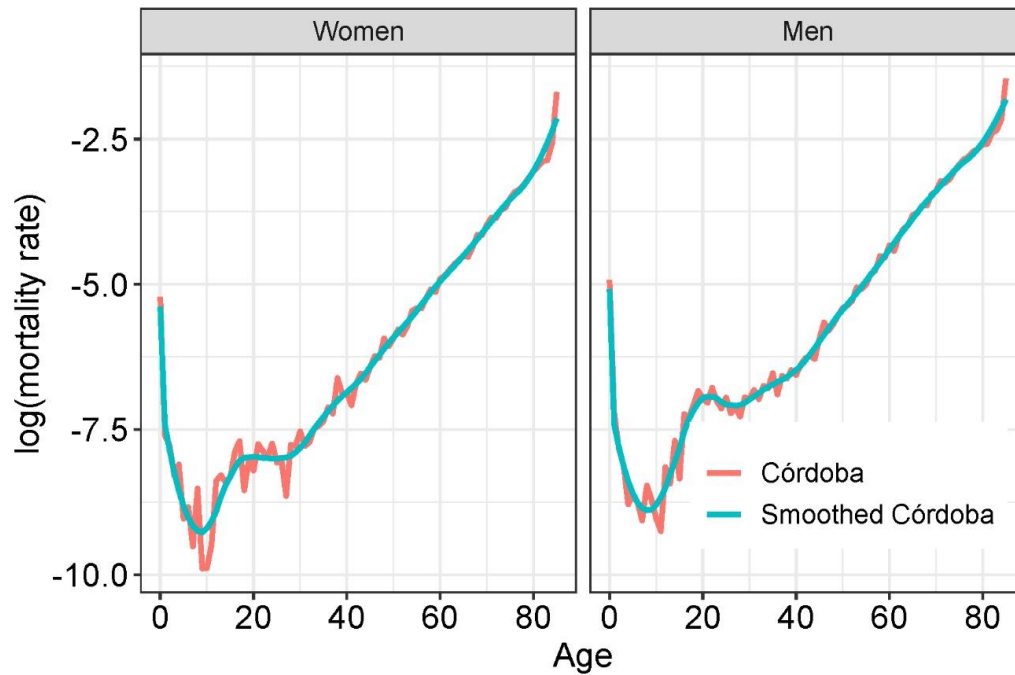

Footnote: because log mortality rates of the standard mortality schedule (labelled Córdoba) were noisy (i.e., contained unexplained variance), we fit a LOESS regression and the resulting LOESS-smoothed curve (labelled Smoothed Córdoba) served as the standard mortality schedule in the analysis.

**Figure S2. Life expectancy at birth (95% Credible Interval) among women and men in small areas. Córdoba, 2015-2018.**

**Women**

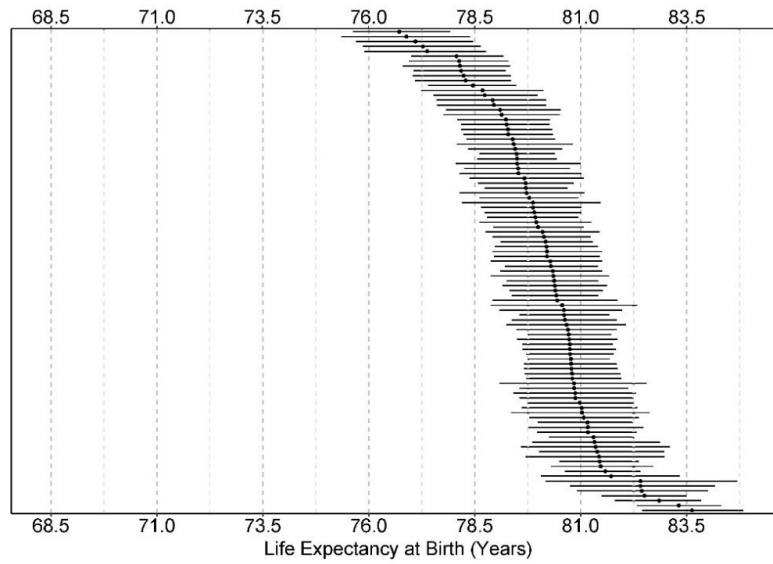

**Men**

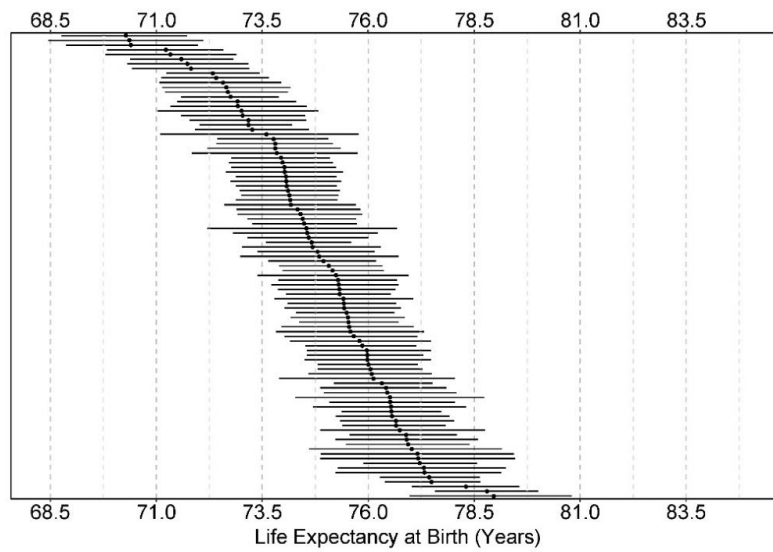

Footnote: small areas are represented in the vertical axis.

**Figure S3. Spatial distribution of life expectancy at birth, 20, 40 and 60 years in women and men in the 99 small areas of city of Córdoba, 2015-2018.**

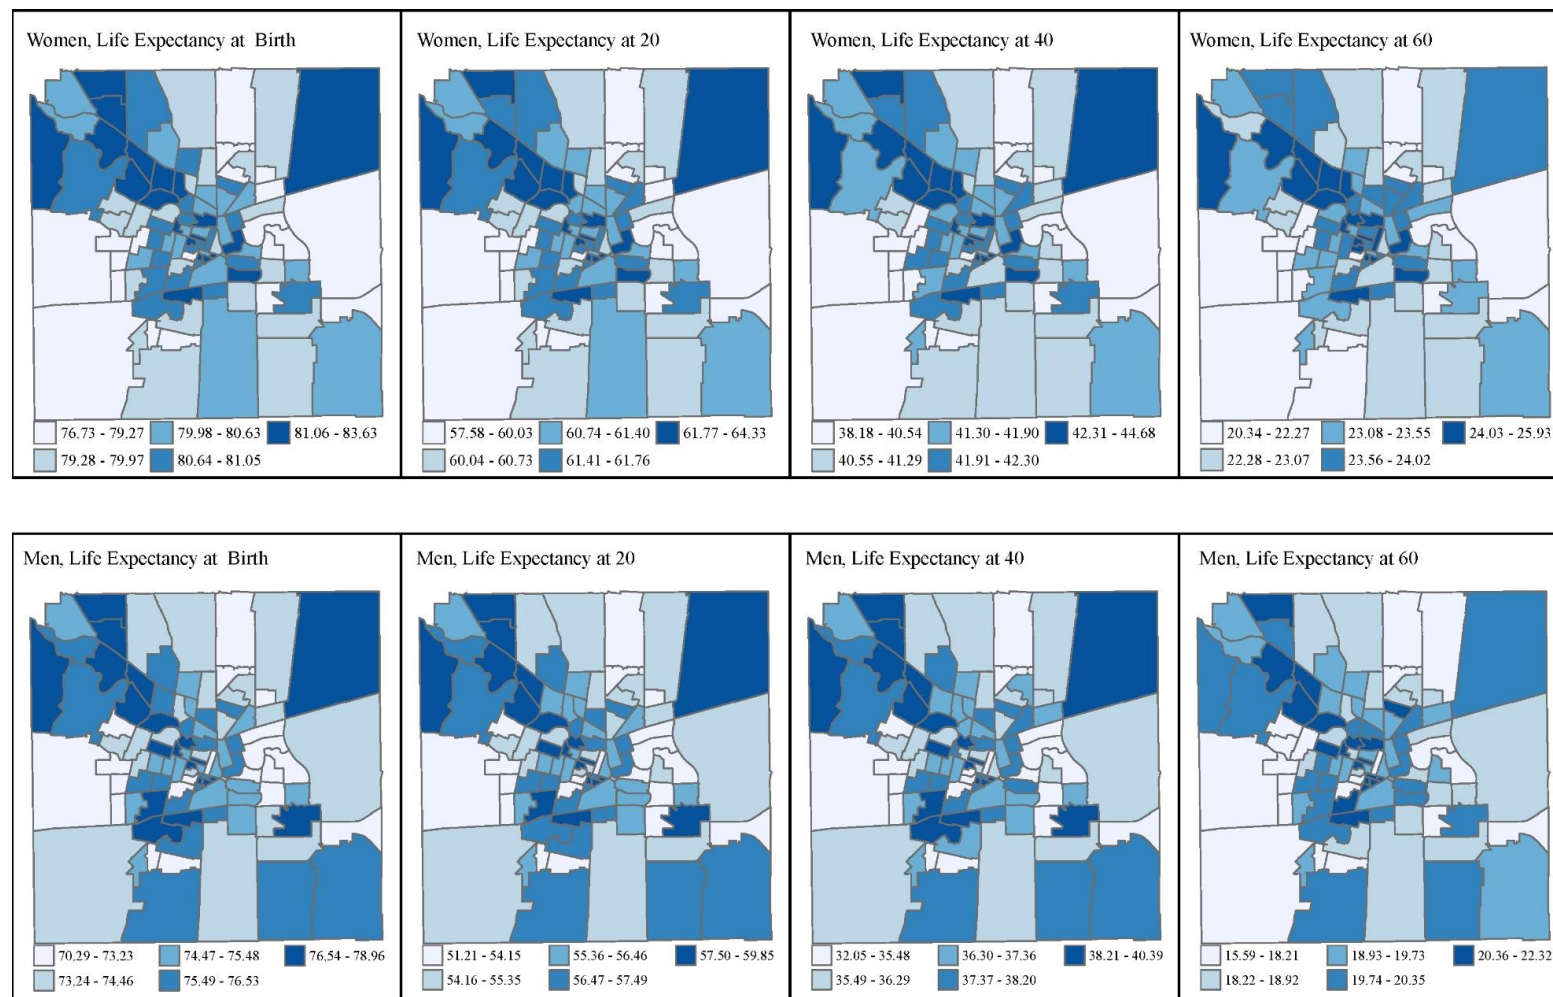

Supplement: bmjopen-2022-061277supp001.pdf [file bmjopen-2022-061277supp001.pdf]
